# Supplementary material
Source: PubMed Central journal article supplement (PMC6884092)

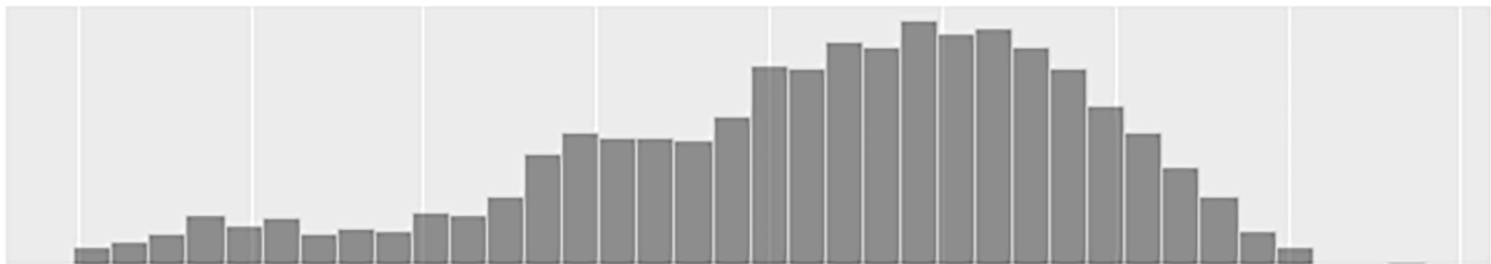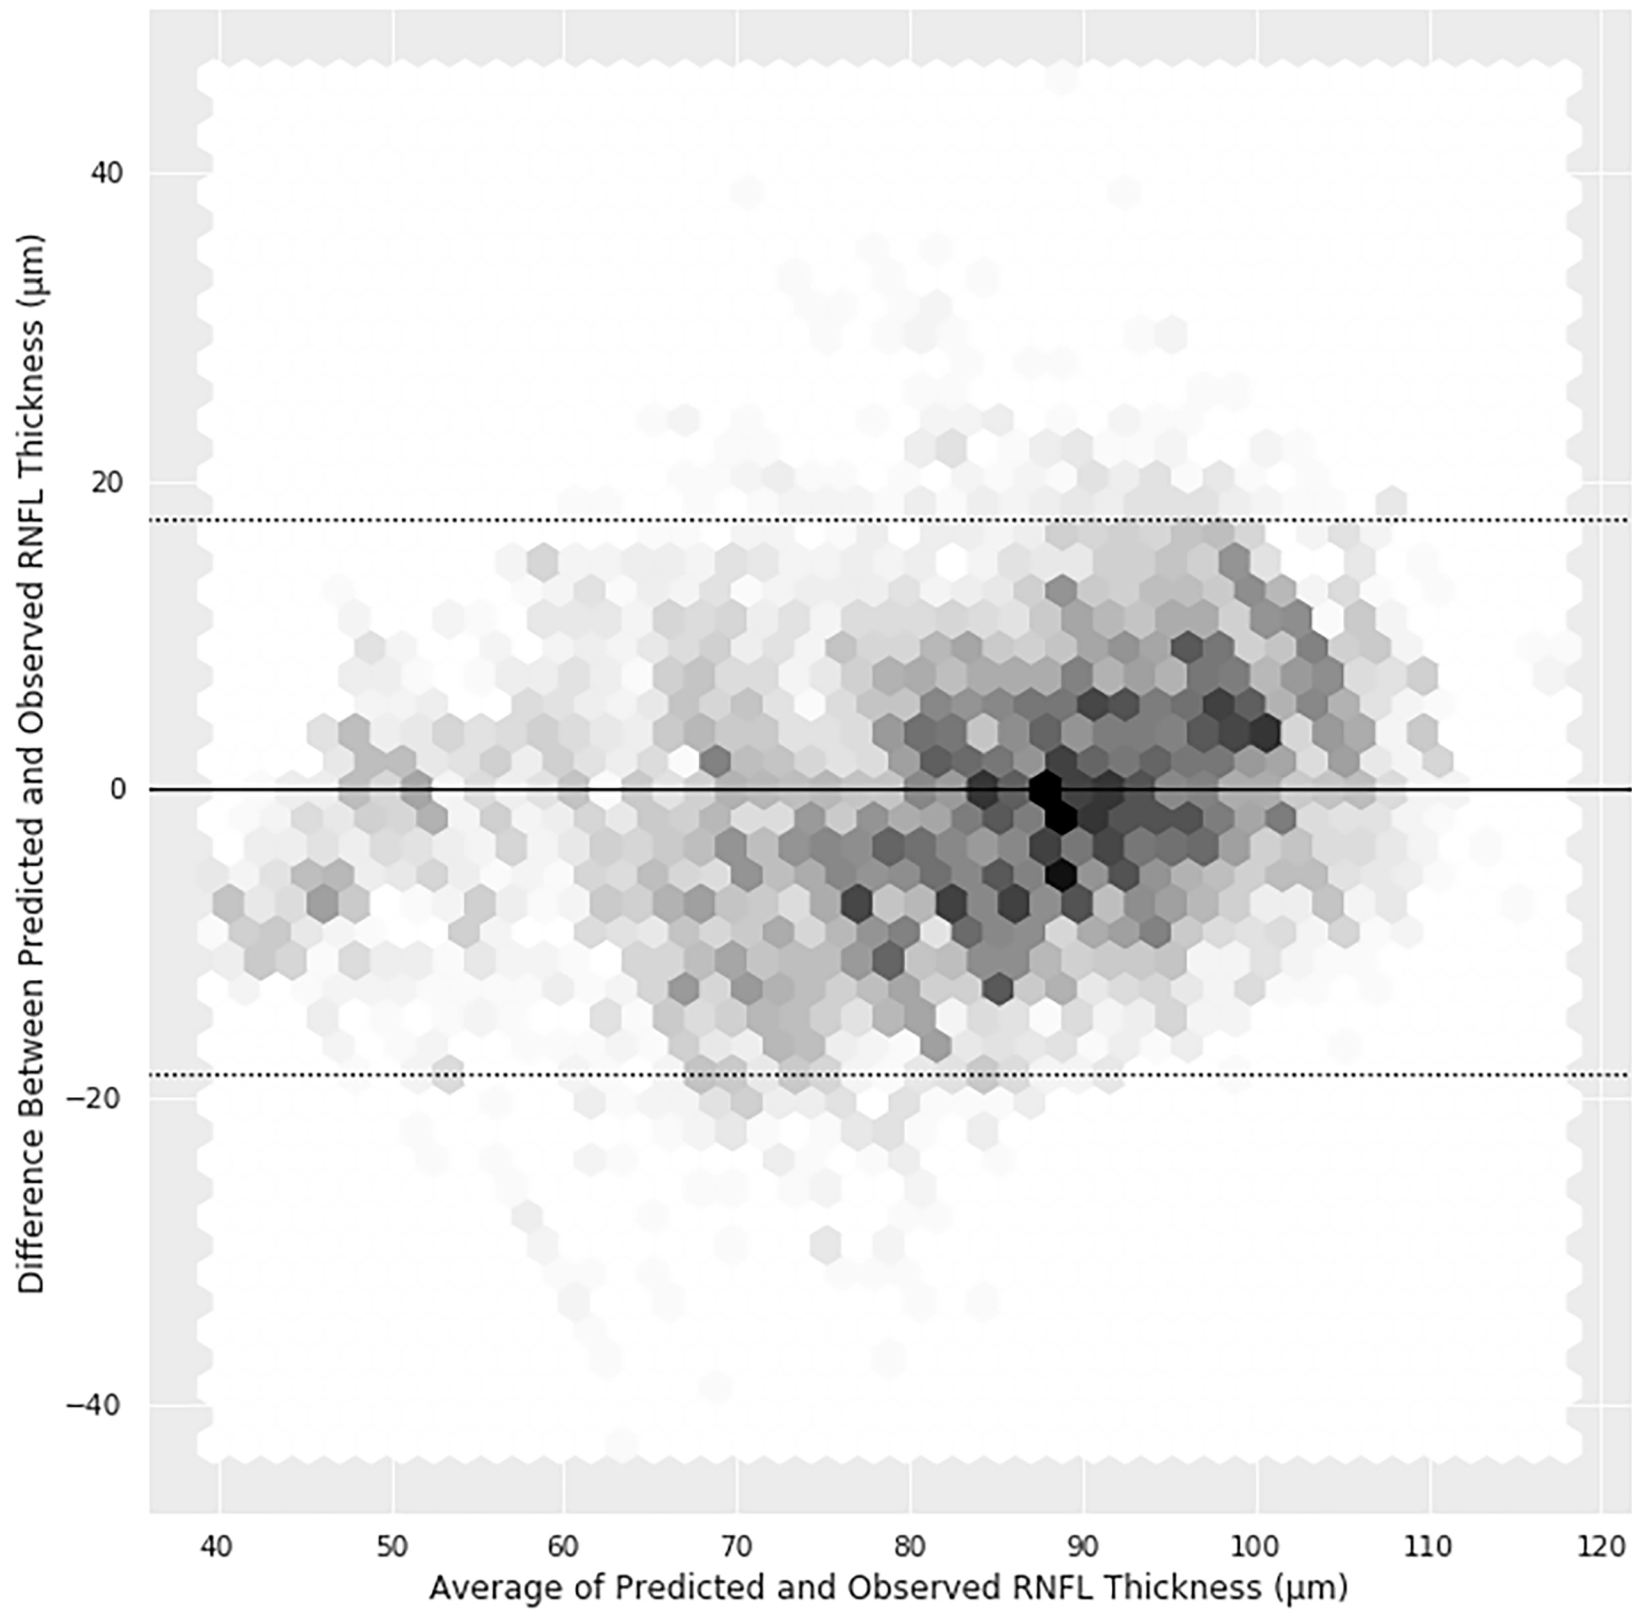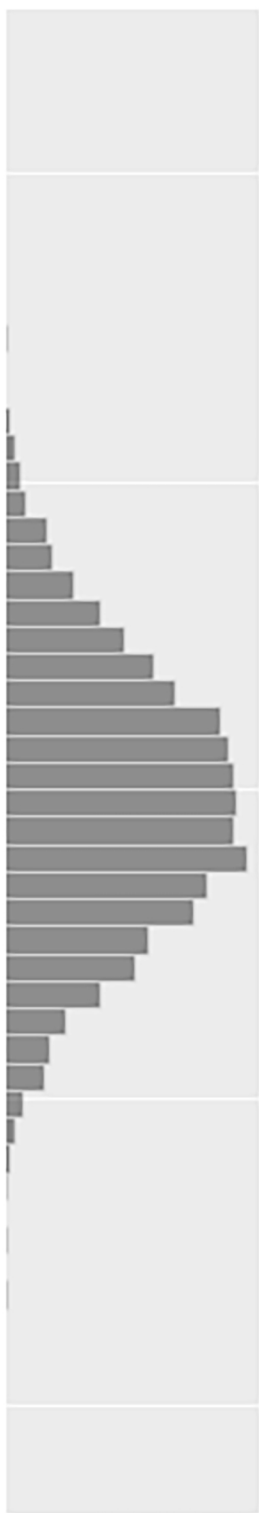

Supplement: NIHMS1517085-supplement-1.pdf [file NIHMS1517085-supplement-1.pdf]

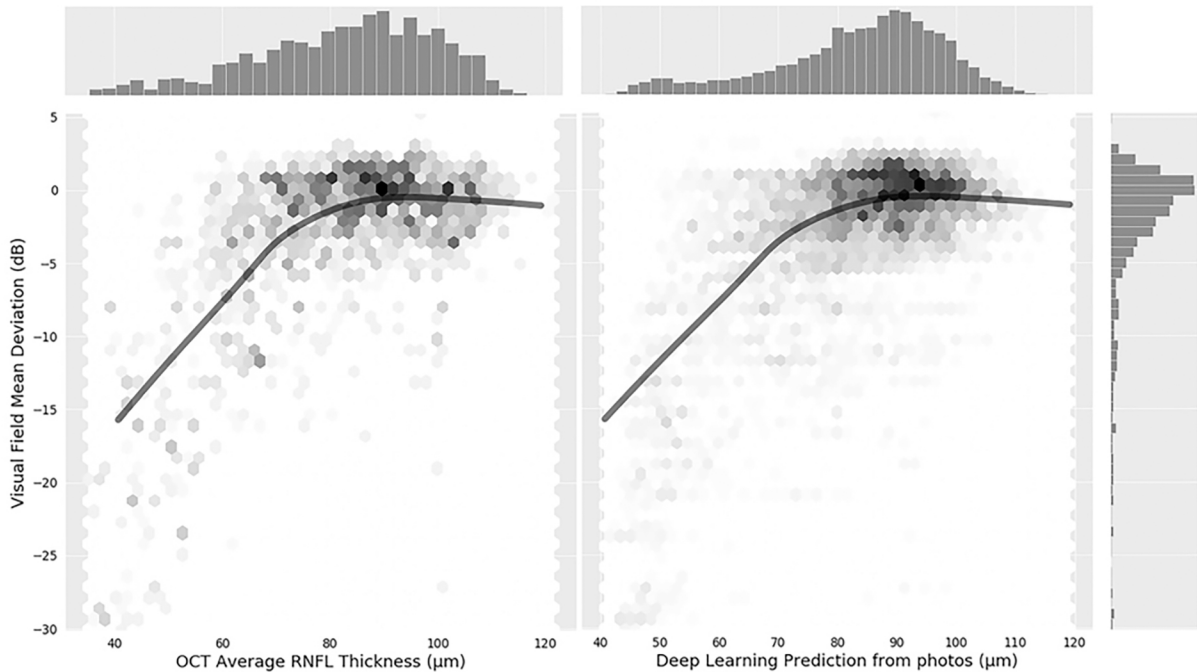

Supplement: NIHMS1517085-supplement-2.pdf [file NIHMS1517085-supplement-2.pdf]
